# Supplementary material
Source: Research Square preprint supplement (doi:10.21203/rs.3.rs-10135070/v1)
Supplement: Supplementary file 1 [file 053e19728f803d484062fd72.xlsx]

## Sheet: Hoja1
Consortia	Bacteria
	PUJ-058	PUJ-074	PUJ-088	PUJ-092	PUJ-102
A
B
C
D
E
F
