# Supplementary material
Source: Research Square preprint supplement (doi:10.21203/rs.3.rs-10135070/v1)
Supplement: Supplementary file 2 [file 3db7cb1fa16956d7239e17a1.xlsx]

## Sheet: Hoja1
	Strain 2	PUJ-QUI056	PUJ-QUI058	PUJ-QUI063	PUJ-QUI065	PUJ-QUI073	PUJ-QUI074	PUJ-QUI078	PUJ-QUI081	PUJ-QUI088	PUJ-QUI090	PUJ-QUI92	PUJ-QUI097	PUJ-QUI098	PUJ-QUI102	PUJ-QUI108	PUJ-QUI112
Strain 1
PUJ-QUI056
PUJ-QUI058
PUJ-QUI063
PUJ-QUI065
PUJ-QUI073
PUJ-QUI074
PUJ-QUI078
PUJ-QUI081
PUJ-QUI088
PUJ-QUI090
PUJ-QUI92
PUJ-QUI097
PUJ-QUI098
PUJ-QUI102
PUJ-QUI108
PUJ-QUI112
