# Supplementary material
Source: Research Square preprint supplement (doi:10.21203/rs.3.rs-10135070/v1)
Supplement: Supplementary file 3 [file 46681412ec114d805fc3a648.xlsx]

## Sheet: Hoja1
Isolate code	Location	Isolation assay- Primary screening	Taxonomic identification	Gen Bank Accesion number	Broad evaluation of PGPR mechanisms
					Nitrogen fixation	Siderophore production	Lipopeptide production	Phosphate solubilization		IAA production
								NBRIP and SMRS1	NBRIP Broth
PUJ-QUI056	Subachoque, Cundinamarca	Phosphate solubilization potential	Pseudomonas sp.	SUB16253999 PUJ-QUI103 PZ524917	-	+	-	+	-	-
PUJ-QUI058	Subachoque, Cundinamarca		Pantoea rodasii	SUB16253999 PUJ-QUI058 PZ524924	-	+	-	+	+	+
PUJ-QUI063	Carmen de Carupa, Cundinamarca		Klebsiella aerogenes	SUB16253999 PUJ-QUI063 PZ524926	-	+	-	+	-	-
PUJ-QUI065	Carmen de Carupa, Cundinamarca		Serratia grimesii	SUB16253999 PUJ-QUI065 PZ524927	-	+	-	+	-	-
PUJ-QUI073	Subachoque, Cundinamarca	AEFB- lipopeptide production potential	Bacillus subtilis	SUB16253999 PUJ-QUI073 PZ524921	-	-	+	-	-	-
PUJ-QUI074	Subachoque, Cundinamarca		Peribacillus simplex	SUB16253999 PUJ-QUI074 PZ524915	-	-	+	-	-	+
PUJ-QUI078	Subachoque, Cundinamarca		Bacillus mycoides	SUB16253999 PUJ-QUI078 PZ524914	-	-	+	-	-	-
PUJ-QUI081	Subachoque, Cundinamarca		Bacillus safensis	SUB16253999 PUJ-QUI081 PZ524925	-	-	+	-	-	-
PUJ-QUI088	Subachoque, Cundinamarca	Siderophores production potential	Pseudomonas fluorescens	SUB16253999 PUJ-QUI024 PZ524922	-	+	-	-	+	-
PUJ-QUI090	Subachoque, Cundinamarca		Chryseobacterium sp.	SUB16253999 PUJ-QUI090 PZ524928	-	+	-	-	-	-
PUJ-QUI92	Carmen de Carupa, Cundinamarca		Pantoea sp.	SUB16253999 PUJ-QUI065 PZ524927	-	+	-	-	+	-
PUJ-QUI097	Carmen de Carupa, Cundinamarca		Pseudomonas putida	SUB16253999 PUJ-QUI104 PZ524923	-	+	-	-	-	-
PUJ-QUI098	Carmen de Carupa, Cundinamarca		Pseudomonas fluorescens	SUB16253999 PUJ-QUI098 PZ524929	-	+	-	-	-	+
PUJ-QUI102	Subachoque, Cundinamarca	Nitrogen fixation potential	Streptomyces sp.	SUB16253999 PUJ-QUI102 PZ524916	+	+	-	-	-	-
PUJ-QUI108	Carmen de Carupa, Cundinamarca		Flavobacterium sp.	SUB16253999 PUJ-QUI108 PZ524918	+	-	-	-	-	-
PUJ-QUI112	Subachoque, Cundinamarca		Bacillus mycoides	SUB16253999 PUJ-QUI112 PZ524920	+	-	-	-	-	-
